# Supplementary material for: Elucidating the sustainability of 700 y of Inuvialuit beluga whale hunting in the Mackenzie River Delta, Northwest Territories, Canada
Source: PubMed Central journal article supplement — Proc Natl Acad Sci U S A. 2024 Aug 13;121(34):e2405993121. doi: 10.1073/pnas.2405993121 (PMC11348011; doi:10.1073/pnas.2405993121), 2024-08-13
Supplement: pnas.2405993121.sapp.pdf [file pnas.2405993121.sapp.pdf]

## Supplementary information

Elucidating the sustainability of 700 years of Inuvialuit beluga whale hunting in the Mackenzie River Delta, Northwest Territories, Canada

Mikkel Skovrind<sup>1</sup>, Marie Louis<sup>1,2</sup>, Steven H. Ferguson<sup>3</sup>, Dmitry M. Glazov<sup>4</sup>, Dennis I. Litovka<sup>5</sup>, Lisa Loseto<sup>3,6</sup>, Ilya G. Meschersky<sup>4</sup>, Mariah Miller<sup>7</sup>, Martin Petr<sup>1</sup>, Lianne Postma<sup>3</sup>, Viatcheslav V. Rozhnov<sup>4</sup>, Michael Scott<sup>7</sup>, Michael V. Westbury<sup>1</sup>, Paul Szpak<sup>7</sup>, T. Max Friesen<sup>8,\*</sup>, Eline D. Lorenzen<sup>1,\*</sup>

Supplementary figures S1-S7 can be found on pages 2-8.

Supplementary tables S1-S9 can be found on page 9-18.

## Supplementary figures

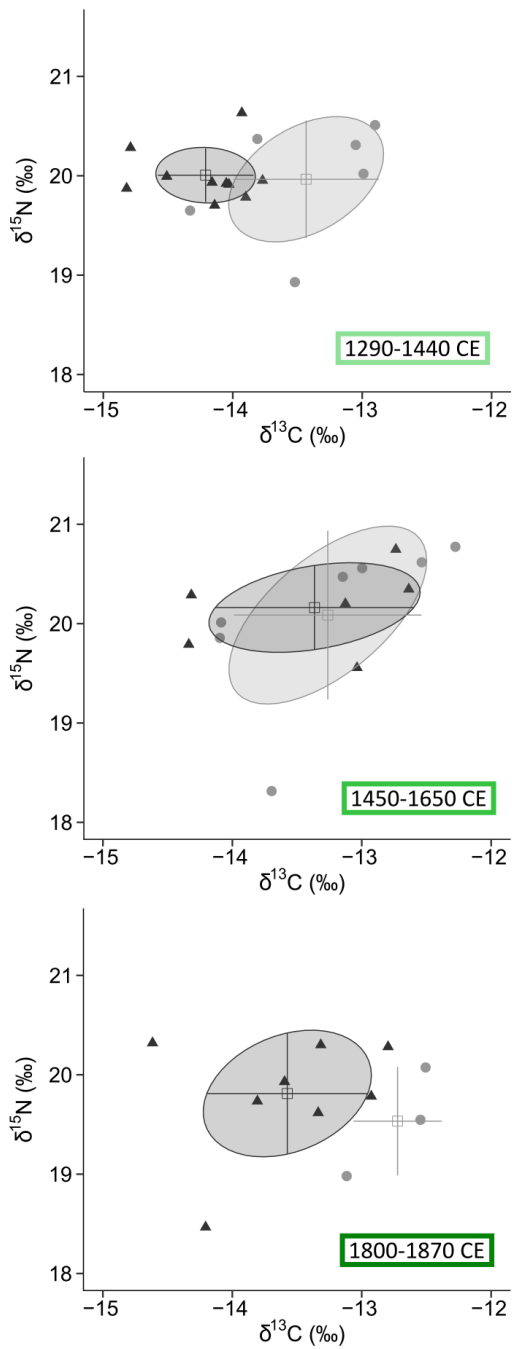

**Figure S1 Bone collagen  $\delta^{13}\text{C}$  and  $\delta^{15}\text{N}$  data for the three historic time periods.** Female (light gray dots) and male (dark gray triangles) belugas for each time period 1290-1440 CE (nF = 6, nM = 10), 1450-1650 CE (nF = 7, nM = 6), and 1800-1870 CE (nF = 3, nM = 8). Solid circles indicate standard ellipse areas encompassing 40% of the data; no ellipse was estimated for females in the lower panel due to small sample size. Mean (square) and SD (error bars) are indicated.

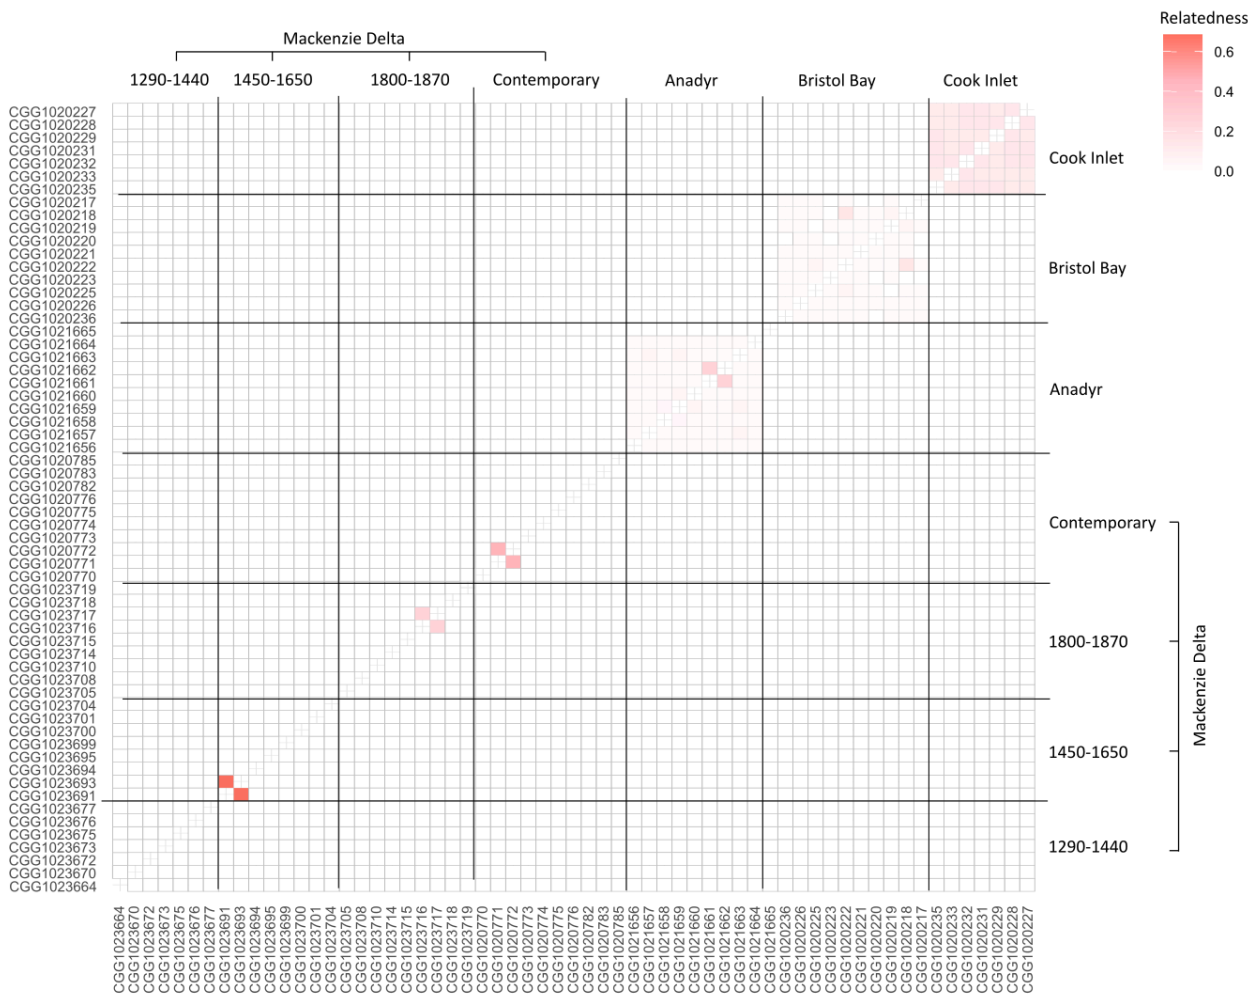

**Figure S2 Heatmap of pairwise relatedness coefficients of 61 belugas from the Mackenzie delta and adjacent populations.** For pairs with relatedness coefficients ( $r$ ) above 0.3, the individual with the lowest coverage was excluded from the nuclear analyses. This led to the exclusion of two individuals; individual CGG102393 from 1450-1650 CE, which was related to CGG102391 ( $r=0.68$ ), and individual CGG1020771 from contemporary Mackenzie Delta, which was related to CGG1020772 ( $r=0.46$ ).

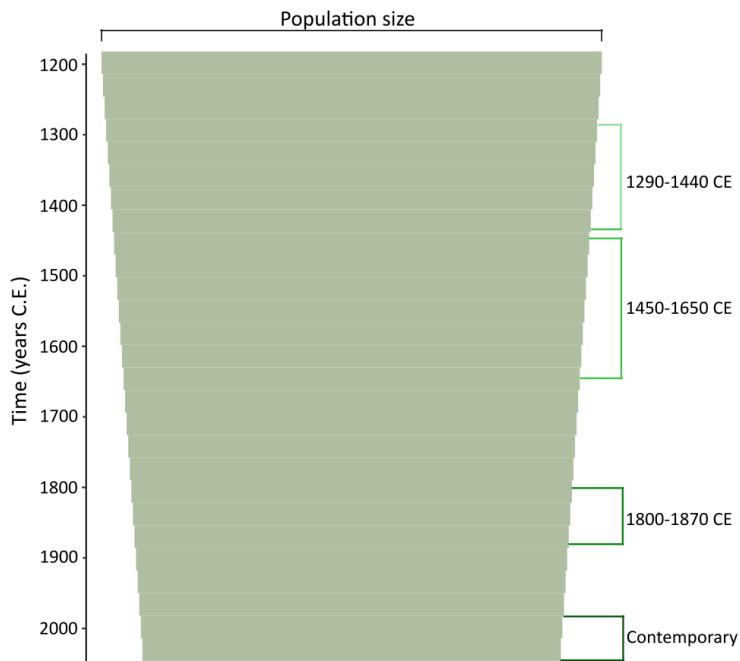

**Figure S3 Schematic representation of our genetic simulations.** We used a slendr (1) model to simulate the effect of hunting on the beluga demographic history. The starting size of the population was always 40.000. The number of individuals removed from the population each generation due to hunting is indicated by each “step” decrease in population size.

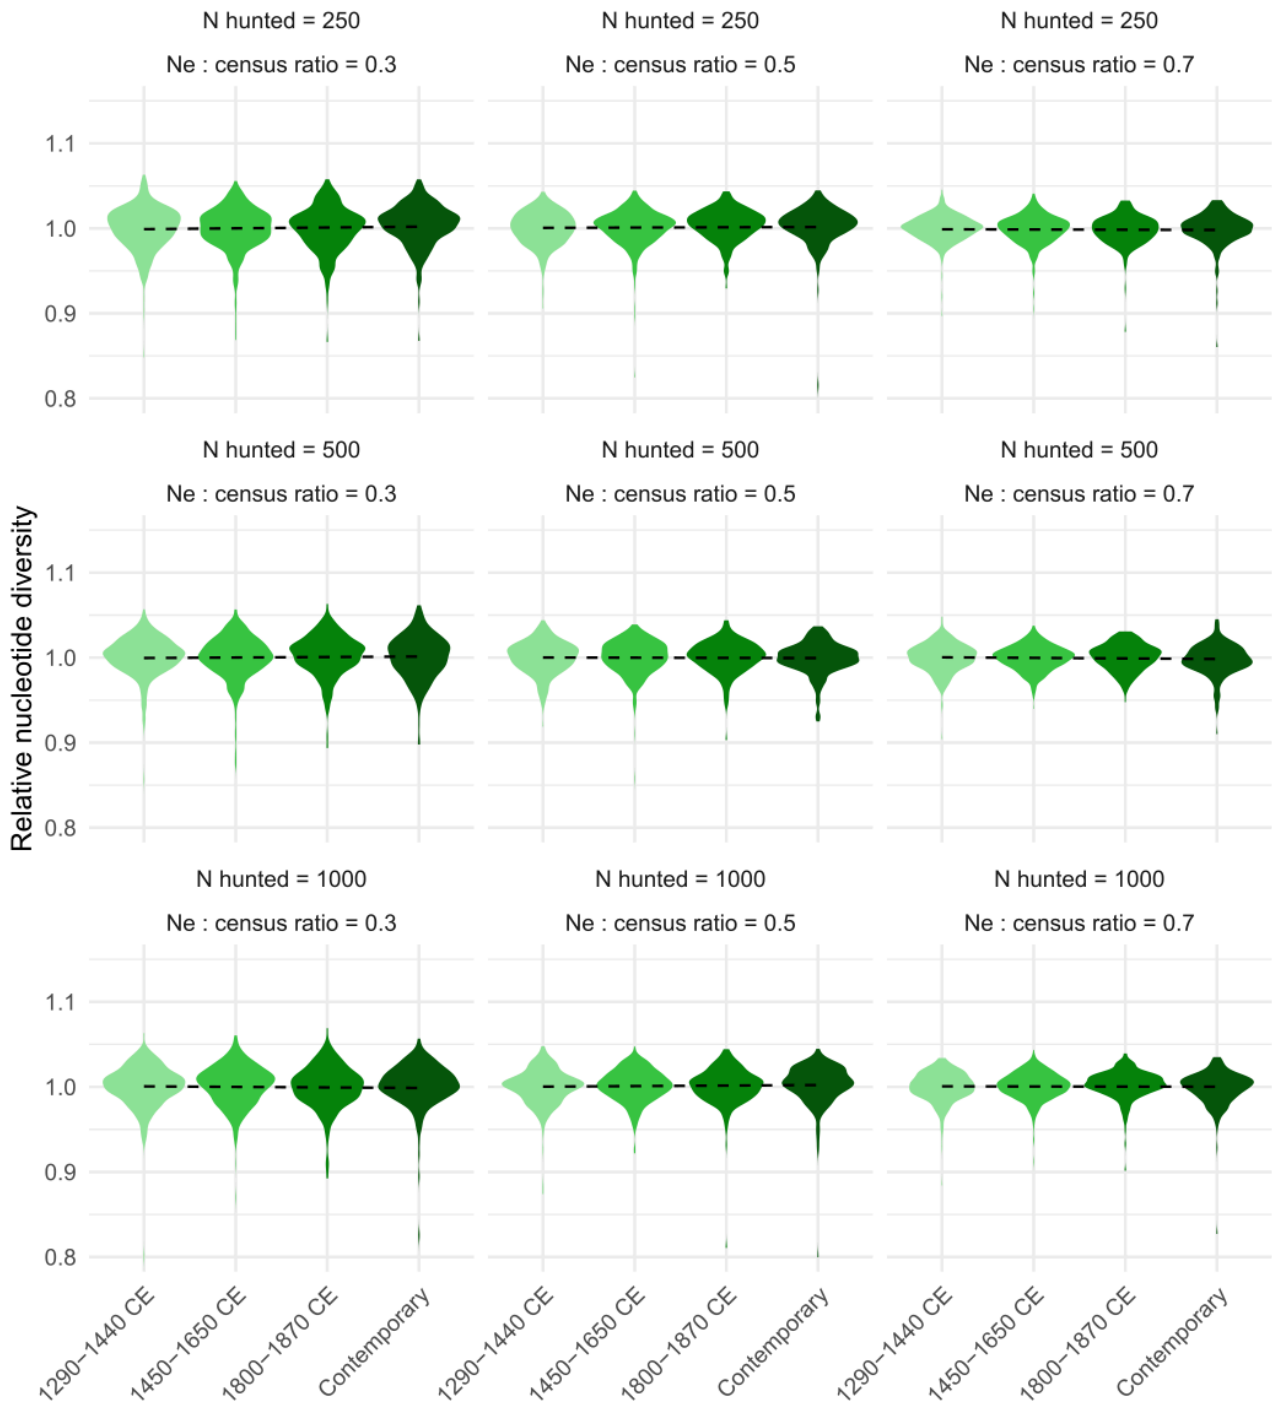

**Figure S4 Distributions of nucleotide diversity across four temporal snapshots of a simulated beluga population, corresponding to our empirical data.** Each panel displays results from individual simulation scenarios. The starting size of the population is always 40.000 individuals. The number of individuals removed from the population each generation due to hunting is indicated at the top of each panel, as is the ratio used to convert these two quantities to the  $N_e$  simulated in each scenario. Nucleotide diversity at each time point is normalized by the mean diversity in the first time period. The black dashed line indicates a linear regression fit of nucleotide diversity as a function of time in each simulated scenario. Table S5 shows the p-value, the R2 (variance explained) and the slope of each linear model.

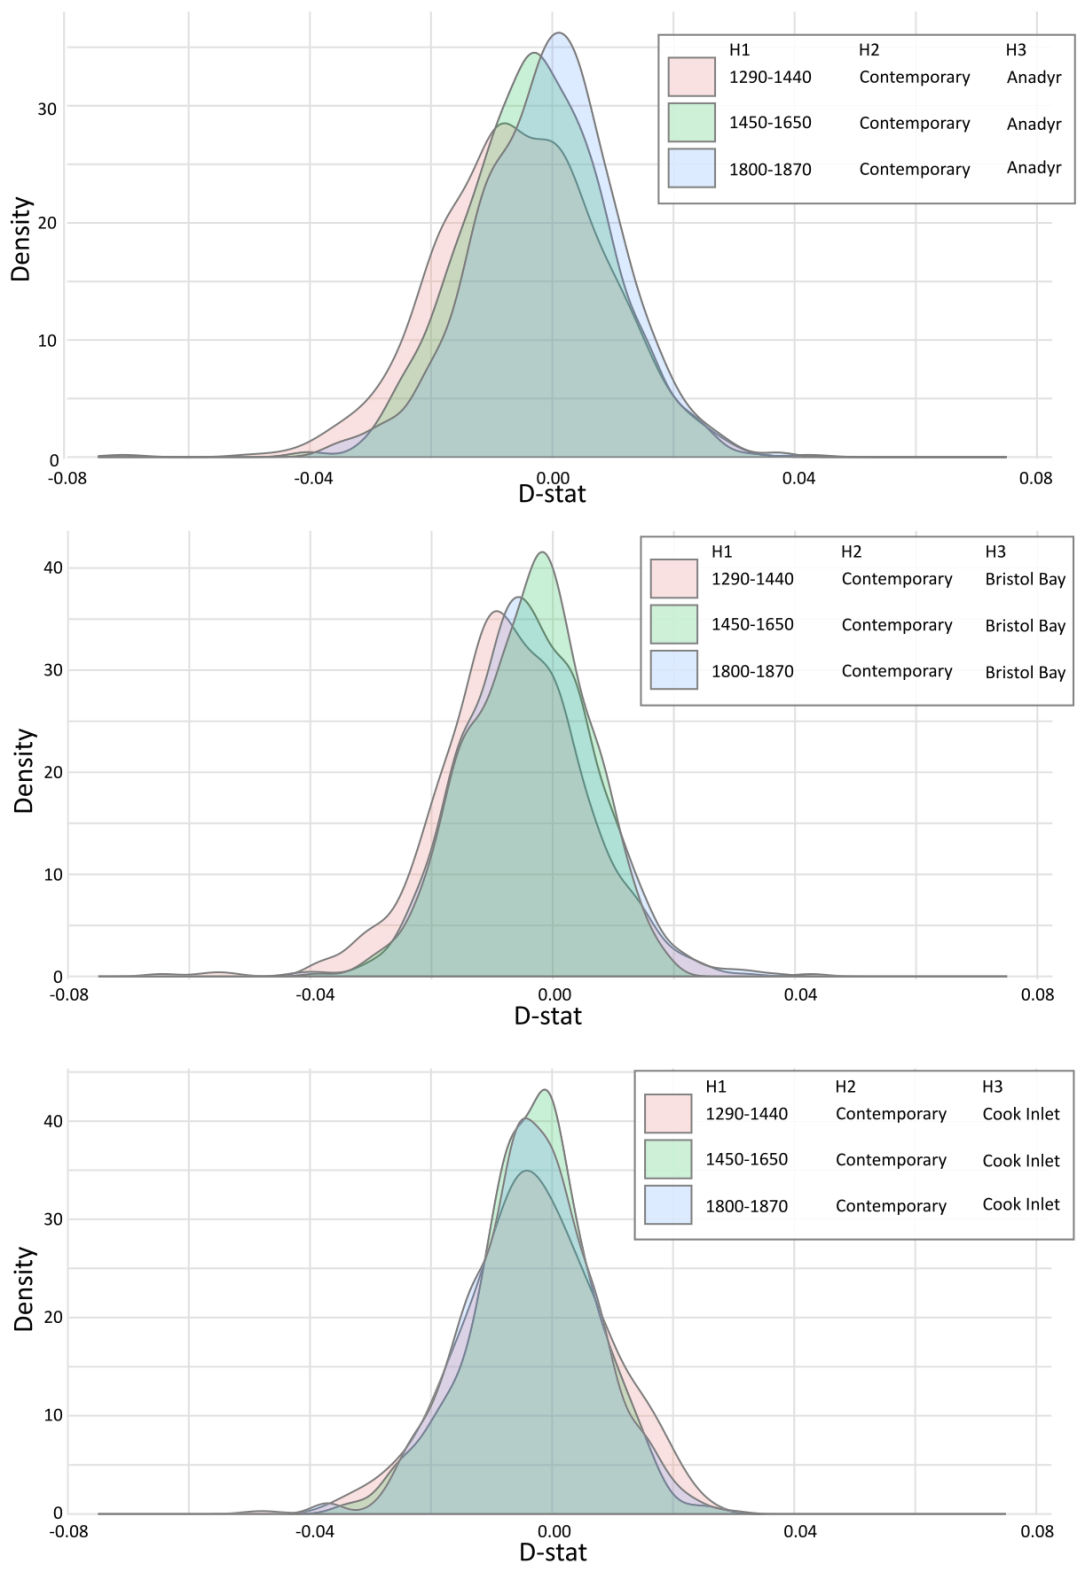

**Figure S5 D statistics summary.** Overview of D statistics estimated for all combinations of individuals (D[H1-Zooarchaeological, H2-Contemporary, H3-Adjacent, Outgroup]) from the four time periods from Mackenzie Delta – comprising three zooarchaeological and one contemporary –, and the three adjacent contemporary populations (Anadyr, Bristol Bay, and Cook Inlet).

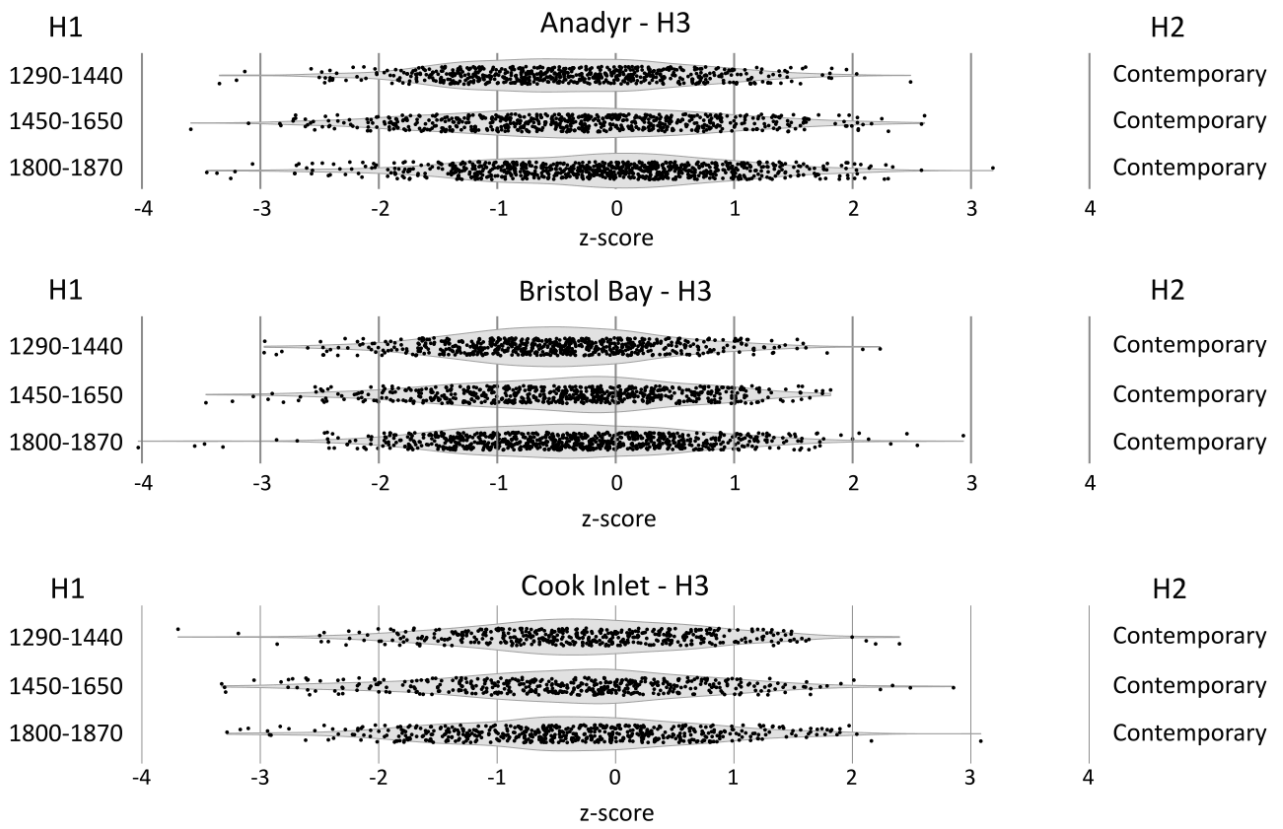

**Figure S6. Z scores from the beluga whale D statistics presented in Figure S5.** Each dot is a z score value from a D[H1-Zooarchaeological, H2-Contemporary, H3-Adjacent, Outgroup] comparison. The violin plots indicate the distribution of z scores.

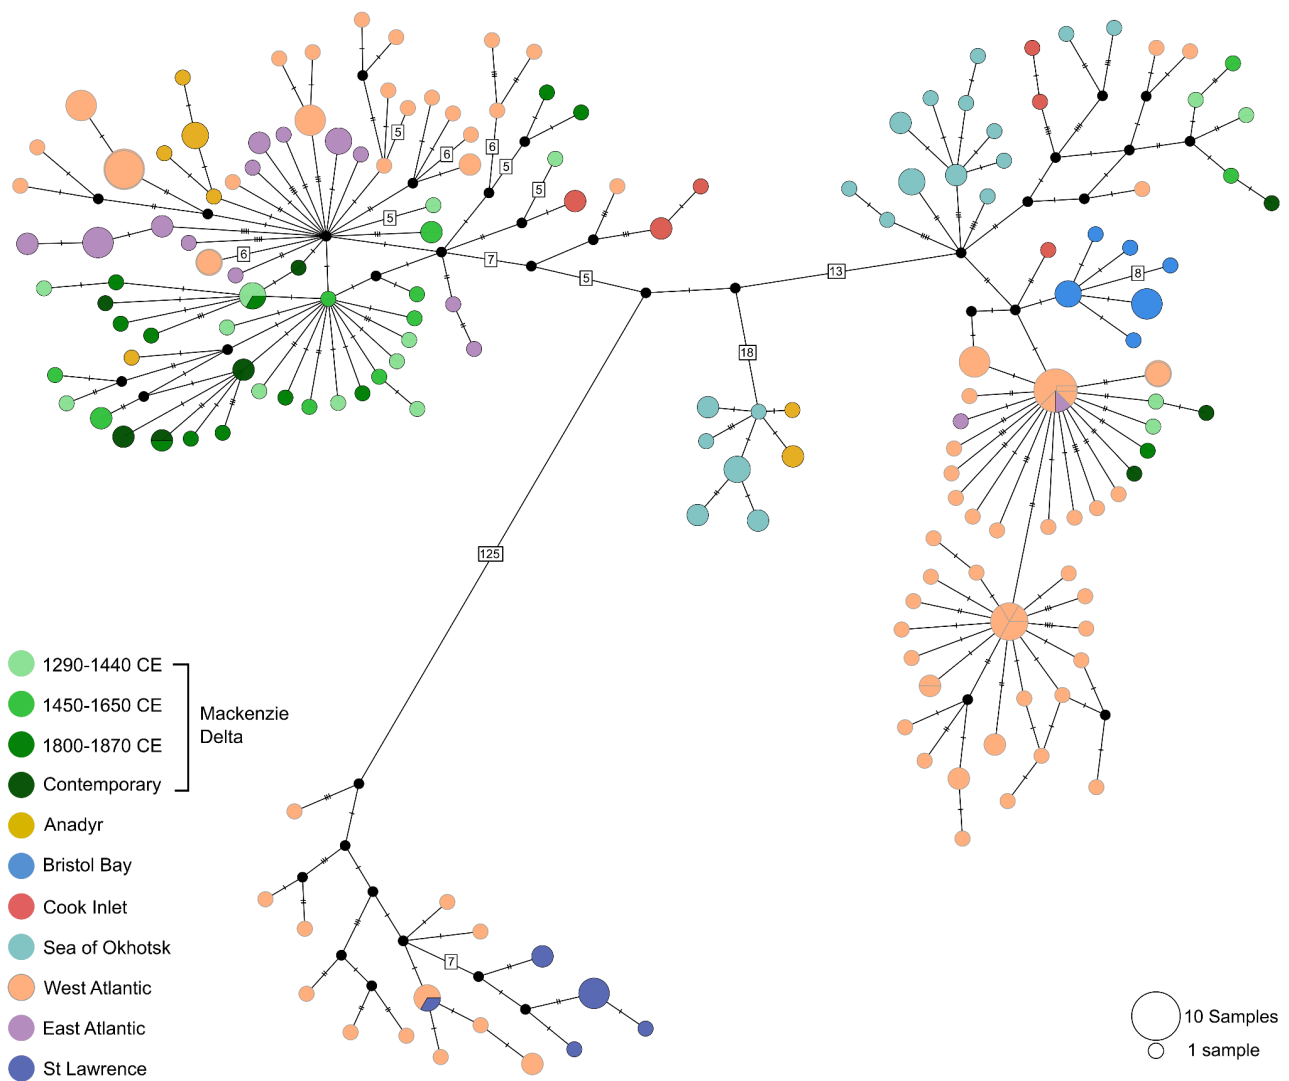

**Figure S7. Global phylogeography of belugas.** Network of the Mackenzie Delta belugas relative to the global dataset of beluga mitochondrial genome haplotypes from Skovrind et al 2021. A total of 164 mitochondrial haplotypes are found among 246 mitochondrial genome sequences. Relative circle size indicates the number of individuals sharing a haplotype. Number of substitutions among haplotypes are indicated by hashes, or by numbers for >4. Black dots indicate haplotypes not found in the dataset. Of note, lengths of branches between haplotypes are not drawn to scale. The Mackenzie belugas, shown in shades of green, do not share haplotypes with any other localities.



## Supplementary tables

**Table S1 Radiocarbon dates from relevant contexts at the Cache Point and Kuukpak sites in Mackenzie River Delta, Northwest Territories, Canada.** Sixteen dates were new to this study. Dates were calibrated using OxCal 4.4.

| <b>Radiocarbon ID</b> | <b>Context</b> | <b>Species sampled</b> | <b>14C age (BP)</b> | <b>±</b> | <b>Calibrated age range CE, 2 sigma</b> | <b>Reference</b> |
|-----------------------|----------------|------------------------|---------------------|----------|-----------------------------------------|------------------|
| UCIAMS 225625         | Cache Point F6 | Dall sheep             | 585                 | 20       | 1310-1409                               | this study       |
| UCIAMS 225626         | Cache Point F6 | Moose                  | 545                 | 20       | 1326-1426                               | this study       |
| BETA 201281           | Cache Point F6 | Caribou                | 620                 | 40       | 1290-1405                               | Friesen 2009     |
| UCIAMS 225627         | Cache Point F8 | Caribou                | 530                 | 20       | 1329-1436                               | this study       |
| UCIAMS 225630         | Cache Point F8 | Caribou                | 505                 | 20       | 1406-1441                               | this study       |
| UCIAMS 225639         | Kuukpak A3H5   | Caribou                | 350                 | 25       | 1465-1635                               | this study       |
| UCIAMS 225640         | Kuukpak A3H5   | Caribou                | 355                 | 20       | 1465-1633                               | this study       |
| UCIAMS 225641         | Kuukpak A3H5   | Caribou                | 305                 | 20       | 1506-1648                               | this study       |
| UCIAMS 225642         | Kuukpak A3H5   | Caribou                | 360                 | 20       | 1459-1632                               | this study       |
| UCIAMS 225643         | Kuukpak A3H5   | Caribou                | 370                 | 20       | 1455-1630                               | this study       |
| UCIAMS 225644         | Kuukpak A3H5   | Caribou                | 370                 | 20       | 1455-1630                               | this study       |
| UCIAMS 225645         | Kuukpak A3H5   | Caribou                | 355                 | 20       | 1465-1633                               | this study       |
| UCIAMS 225646         | Kuukpak A3H5   | Moose                  | 315                 | 20       | 1499-1644                               | this study       |
| UCIAMS 225647         | Kuukpak A3H5   | Caribou                | 375                 | 20       | 1453-1625                               | this study       |
| UCIAMS 225632         | Kuukpak A5H1   | Caribou                | 300                 | 25       | 1500-1655                               | this study       |
| UCIAMS 225637         | Kuukpak A5H1   | Moose                  | 345                 | 20       | 1475-1635                               | this study       |
| UCIAMS 225638         | Kuukpak A5H1   | Caribou                | 140                 | 20       | 1673-1944                               | this study       |

**Table S2 Sample overview of the beluga whale specimens analyzed.** For all samples, we include specimen ID (CGG numbers registered at the Globe Institute, University of Copenhagen), sample provider ID, locality, age, sampling time, mtDNA coverage, nuclear coverage, X chromosome to autosomal coverage ratios, and NCBI accession number. For the 45 zooarchaeological specimens, we also include time period, TEAL (laboratory ID at the University of Trent, Canada), and Collagen yield (%),  $\delta^{13}C$ ,  $\delta^{15}N$ , C:N Atomic ratio.

| CGG ID     | Sample provider ID | Teal ID | Locality                     | Age       | Sampling dd/mm/yyyy | House | Collagen yield (%) | $\delta^{13}C$ | $\delta^{15}N$ | C:N Atomic | mtDNA coverage | nuclear DNA coverage | X chromosome                 |   | Genetic sex | Accession |
|------------|--------------------|---------|------------------------------|-----------|---------------------|-------|--------------------|----------------|----------------|------------|----------------|----------------------|------------------------------|---|-------------|-----------|
|            |                    |         |                              |           |                     |       |                    |                |                |            |                |                      | to autosomal coverage ratios |   |             |           |
| CGG1023664 | NhTs-2-1           | NA      | Mackenzie Delta, Cache Point | 1290-1440 | NA/NA/1998          | H6    | NA                 | -14.79         | 20.29          | 3.5        | 221.72         | 0.55                 | 0.59                         | M | ERS18420459 |           |
| CGG1023665 | NhTs-2-2           | 2958    | Mackenzie Delta, Cache Point | 1290-1440 | NA/NA/1998          | H6    | 3.3                | -13.81         | 20.37          | 3.4        | 127.55         | 0.02                 | 1.04                         | F | ERS18420460 |           |
| CGG1023666 | NhTs-2-3           | 2959    | Mackenzie Delta, Cache Point | 1290-1440 | NA/NA/1998          | H6    | 10.3               | -14.33         | 19.65          | 3.3        | 105.76         | 0.02                 | 1.08                         | F | ERS18420461 |           |
| CGG1023667 | NhTs-2-4           | 2960    | Mackenzie Delta, Cache Point | 1290-1440 | NA/NA/1998          | H6    | 3.2                | -14.82         | 19.88          | 3.5        | 3.30           | 0.02                 | 0.68                         | M | ERS18420462 |           |
| CGG1023668 | NhTs-2-5           | 2961    | Mackenzie Delta, Cache Point | 1290-1440 | NA/NA/1998          | H6    | 6.3                | -14.05         | 19.93          | 3.4        | 144.99         | 0.04                 | 0.57                         | M | ERS18420463 |           |
| CGG1023669 | NhTs-2-6           | 2962    | Mackenzie Delta, Cache Point | 1290-1440 | NA/NA/1998          | H6    | 6.5                | -14.03         | 19.92          | 3.2        | 15.95          | 0.04                 | 0.58                         | M | ERS18420464 |           |
| CGG1023670 | NhTs-2-7           | 2963    | Mackenzie Delta, Cache Point | 1290-1440 | NA/NA/1998          | H6    | 5.5                | -13.93         | 20.64          | 3.2        | 194.98         | 0.49                 | 0.58                         | M | ERS18420465 |           |
| CGG1023671 | NhTs-2-8           | 2964    | Mackenzie Delta, Cache Point | 1290-1440 | NA/NA/1998          | H6    | 6.3                | -14.51         | 20             | 3.3        | 24.78          | 0.13                 | 0.58                         | M | ERS18420466 |           |
| CGG1023672 | NhTs-2-9           | 2965    | Mackenzie Delta, Cache Point | 1290-1440 | NA/NA/1998          | H6    | 7.4                | -12.99         | 20.02          | 3.3        | 111.13         | 0.84                 | 1.04                         | F | ERS18420467 |           |
| CGG1023673 | NhTs-2-10          | 2966    | Mackenzie Delta, Cache Point | 1290-1440 | NA/NA/1999          | H8    | 3.1                | -12.9          | 20.51          | 3.2        | 72.66          | 0.41                 | 1.04                         | F | ERS18420468 |           |
| CGG1023675 | NhTs-2-12          | NA      | Mackenzie Delta, Cache Point | 1290-1440 | NA/NA/1999          | H8    | NA                 | -14.16         | 19.94          | 3.5        | 187.97         | 0.95                 | 0.56                         | M | ERS18420469 |           |
| CGG1023676 | NhTs-2-13          | 2967    | Mackenzie Delta, Cache Point | 1290-1440 | NA/NA/1999          | H8    | 8.7                | -13.77         | 19.96          | 3.3        | 32.59          | 0.20                 | 0.58                         | M | ERS18420470 |           |
| CGG1023677 | NhTs-2-14          | 2968    | Mackenzie Delta, Cache Point | 1290-1440 | NA/NA/1999          | H8    | NA                 | -13.52         | 18.93          | 3.2        | 87.17          | 0.61                 | 1.06                         | F | ERS18420471 |           |
| CGG1023680 | NhTs-2-17          | NA      | Mackenzie Delta, Cache Point | 1290-1440 | NA/NA/1999          | H8    | NA                 | NA             | NA             | NA         | 87.76          | 0.03                 | 0.60                         | M | ERS18420472 |           |
| CGG1023683 | NhTs-2-20          | 2969    | Mackenzie Delta, Cache Point | 1290-1440 | NA/NA/1999          | H8    | 3.6                | -13.05         | 20.31          | 3.2        | 7.56           | 0.03                 | 1.05                         | F | ERS18420473 |           |
| CGG1023685 | NhTs-2-22          | NA      | Mackenzie Delta, Cache Point | 1290-1440 | NA/NA/2015          | H8    | NA                 | -14.14         | 19.71          | 3.3        | 164.50         | 0.02                 | 0.59                         | M | ERS18420474 |           |
| CGG1023688 | NhTs-2-25          | NA      | Mackenzie Delta, Cache Point | 1290-1440 | NA/NA/1999          | H8    | NA                 | NA             | NA             | NA         | 95.46          | 0.01                 | 0.59                         | M | ERS18420475 |           |
| CGG1023690 | NhTs-2-27          | NA      | Mackenzie Delta, Cache Point | 1290-1440 | NA/NA/1999          | H8    | NA                 | -13.9          | 19.79          | 3.4        | 158.96         | 0.01                 | 0.59                         | M | ERS18420476 |           |
| CGG1023691 | NiTs-1-1           | 2970    | Mackenzie Delta, Kuukpak     | 1450-1650 | NA/NA/2014          | A3H5  | 4.3                | -12.64         | 20.41          | 3.4        | 497.71         | 0.73                 | 1.03                         | F | ERS18420477 |           |
| CGG1023692 | NiTs-1-2           | 2971    | Mackenzie Delta, Kuukpak     | 1450-1650 | NA/NA/2014          | A3H5  | 2                  | -13            | 20.62          | 3.2        | 21.63          | 0.09                 | 1.03                         | F | ERS18420478 |           |
| CGG1023693 | NiTs-1-3           | 2972    | Mackenzie Delta, Kuukpak     | 1450-1650 | NA/NA/2014          | A3H5  | 3                  | -14.1          | 19.9           | 3.5        | 299.42         | 0.65                 | 0.96                         | F | ERS18420479 |           |
| CGG1023694 | NiTs-1-4           | 2973    | Mackenzie Delta, Kuukpak     | 1450-1650 | NA/NA/2014          | A3H5  | 2.3                | -12.28         | 20.84          | 3.2        | 216.18         | 1.83                 | 1.05                         | F | ERS18420480 |           |
| CGG1023695 | NiTs-1-5           | 2974    | Mackenzie Delta, Kuukpak     | 1450-1650 | NA/NA/2014          | A3H5  | 4.7                | -14.32         | 20.35          | 3.1        | 659.84         | 3.86                 | 0.56                         | M | ERS18420481 |           |
| CGG1023696 | NiTs-1-6           | 2975    | Mackenzie Delta, Kuukpak     | 1450-1650 | NA/NA/2014          | A3H5  | 2.2                | -14.34         | 19.84          | 3.3        | 10.65          | 0.11                 | 0.48                         | M | ERS18420482 |           |
| CGG1023697 | NiTs-1-7           | 2976    | Mackenzie Delta, Kuukpak     | 1450-1650 | NA/NA/2014          | A3H5  | 2.4                | -12.74         | 20.82          | 3.2        | 38.12          | 0.08                 | 0.55                         | M | ERS18420483 |           |
| CGG1023698 | NiTs-1-8           | 2977    | Mackenzie Delta, Kuukpak     | 1450-1650 | NA/NA/2014          | A3H5  | 2.6                | -13.13         | 20.26          | 3.2        | 25.84          | 0.09                 | 0.55                         | M | ERS18420484 |           |
| CGG1023699 | NiTs-1-9           | 2978    | Mackenzie Delta, Kuukpak     | 1450-1650 | NA/NA/2016          | A3H5  | 0.9                | -13.15         | 20.53          | 3.2        | 233.11         | 1.11                 | 1.01                         | F | ERS18420485 |           |
| CGG1023700 | NiTs-1-10          | 2979    | Mackenzie Delta, Kuukpak     | 1450-1650 | NA/NA/2016          | A3H5  | 2.9                | -13.04         | 19.06          | 3.3        | 158.09         | 1.78                 | 0.53                         | M | ERS18420486 |           |
| CGG1023701 | NiTs-1-11          | 2980    | Mackenzie Delta, Kuukpak     | 1450-1650 | NA/NA/2016          | A3H5  | 0.5                | -13.7          | 18.32          | 3.4        | 311.55         | 2.65                 | 1.07                         | F | ERS18420487 |           |
| CGG1023702 | NiTs-1-12          | 2981    | Mackenzie Delta, Kuukpak     | 1450-1650 | NA/NA/2016          | A3H5  | 1.3                | -14.09         | 20.06          | 3.6        | 24.45          | 0.13                 | 1.03                         | F | ERS18420488 |           |
| CGG1023704 | NiTs-1-14          | 2982    | Mackenzie Delta, Kuukpak     | 1450-1650 | NA/NA/2016          | A3H5  | 6.1                | -12.54         | 20.68          | 3.3        | 234.99         | 1.07                 | 1.07                         | F | ERS18420489 |           |
| CGG1023705 | NiTs-1-15          | 2983    | Mackenzie Delta, Kuukpak     | 1800-1870 | NA/NA/2017          | A5H1  | 6                  | -12.51         | 20.13          | 3.3        | 93.22          | 0.39                 | 1.11                         | F | ERS18420490 |           |
| CGG1023706 | NiTs-1-16          | 2984    | Mackenzie Delta, Kuukpak     | 1800-1870 | NA/NA/2017          | A5H1  | 6.9                | -13.12         | 19.01          | 3.3        | 31.97          | 0.10                 | 1.05                         | F | ERS18420491 |           |
| CGG1023707 | NiTs-1-17          | NA      | Mackenzie Delta, Kuukpak     | 1800-1870 | NA/NA/2017          | A5H1  | NA                 | NA             | NA             | NA         | 52.03          | 0.10                 | 1.08                         | F | ERS18420492 |           |

|            |           |      |                                     |              |            |      |     |        |       |     |         |      |      |   |             |
|------------|-----------|------|-------------------------------------|--------------|------------|------|-----|--------|-------|-----|---------|------|------|---|-------------|
| CGG1023708 | NiTs-1-18 | NA   | Mackenzie Delta, Kuukpak            | 1800-1870    | NA/NA/2017 | A5H1 | NA  | NA     | NA    | NA  | 230.15  | 1.30 | 0.59 | M | ERS18420493 |
| CGG1023709 | NiTs-1-19 | 2986 | Mackenzie Delta, Kuukpak            | 1800-1870    | NA/NA/2017 | A5H1 | 5.3 | -13.81 | 19.79 | 3.4 | 11.82   | 0.04 | 0.59 | M | ERS18420494 |
| CGG1023710 | NiTs-1-20 | 2987 | Mackenzie Delta, Kuukpak            | 1800-1870    | NA/NA/2017 | A5H1 | 4.4 | -13.34 | 19.67 | 3.3 | 411.06  | 1.25 | 0.58 | M | ERS18420495 |
| CGG1023711 | NiTs-1-21 | NA   | Mackenzie Delta, Kuukpak            | 1800-1870    | NA/NA/2017 | A5H1 | NA  | NA     | NA    | NA  | 0.00    | 0.00 | 0.99 | F | ERS18420496 |
| CGG1023713 | NiTs-1-22 | 2989 | Mackenzie Delta, Kuukpak            | 1800-1870    | NA/NA/2017 | A5H1 | 6.5 | -13.6  | 19.99 | 3.2 | 28.82   | 0.06 | 0.57 | M | ERS18420497 |
| CGG1023714 | NiTs-1-24 | 2990 | Mackenzie Delta, Kuukpak            | 1800-1870    | NA/NA/2017 | A5H1 | 1.6 | -14.21 | 18.49 | 3.4 | 156.58  | 0.89 | 0.57 | M | ERS18420498 |
| CGG1023715 | NiTs-1-25 | 2991 | Mackenzie Delta, Kuukpak            | 1800-1870    | NA/NA/2017 | A5H1 | 3.4 | -13.32 | 20.37 | 3.3 | 216.99  | 1.10 | 0.56 | M | ERS18420499 |
| CGG1023716 | NiTs-1-26 | 2992 | Mackenzie Delta, Kuukpak            | 1800-1870    | NA/NA/2017 | A5H1 | 7   | -12.93 | 19.84 | 3.3 | 338.48  | 1.70 | 0.57 | M | ERS18420500 |
| CGG1023717 | NiTs-1-27 | 2993 | Mackenzie Delta, Kuukpak            | 1800-1870    | NA/NA/2017 | A5H1 | 2.9 | -12.8  | 20.35 | 3.2 | 180.06  | 0.95 | 0.55 | M | ERS18420501 |
| CGG1023718 | NiTs-1-28 | 2994 | Mackenzie Delta, Kuukpak            | 1800-1870    | NA/NA/2017 | A5H1 | 3.4 | -12.55 | 19.59 | 3.3 | 232.19  | 1.64 | 1.05 | F | ERS18420502 |
| CGG1023719 | NiTs-1-29 | NA   | Mackenzie Delta, Kuukpak            | 1800-1870    | NA/NA/2017 | A5H1 | NA  | -14.62 | 20.39 | 3.5 | 346.65  | 1.11 | 0.56 | M | ERS18420503 |
| CGG1020770 | HI-05-27  | NA   | Mackenzie Delta, Hendrickson Island | Contemporary | NA/NA/2005 | NA   | NA  | NA     | NA    | NA  | 1009.20 | 0.95 | 1.05 | F | ERS18420504 |
| CGG1020771 | HI-04-01  | NA   | Mackenzie Delta, Hendrickson Island | Contemporary | 03/07/2004 | NA   | NA  | NA     | NA    | NA  | 917.90  | 0.96 | 0.55 | M | ERS18420505 |
| CGG1020772 | HI-04-1B  | NA   | Mackenzie Delta, Hendrickson Island | Contemporary | 03/07/2004 | NA   | NA  | NA     | NA    | NA  | 695.11  | 0.96 | 0.55 | M | ERS18420506 |
| CGG1020773 | HI-04-02  | NA   | Mackenzie Delta, Hendrickson Island | Contemporary | 04/07/2004 | NA   | NA  | NA     | NA    | NA  | 695.83  | 0.85 | 1.00 | F | ERS18420507 |
| CGG1020774 | HI-04-05  | NA   | Mackenzie Delta, Hendrickson Island | Contemporary | 05/07/2004 | NA   | NA  | NA     | NA    | NA  | 858.99  | 1.15 | 0.54 | M | ERS18420508 |
| CGG1020775 | HI-04-06  | NA   | Mackenzie Delta, Hendrickson Island | Contemporary | 08/07/2004 | NA   | NA  | NA     | NA    | NA  | 1032.24 | 0.66 | 0.55 | M | ERS18420509 |
| CGG1020776 | HI-04-07  | NA   | Mackenzie Delta, Hendrickson Island | Contemporary | 08/07/2004 | NA   | NA  | NA     | NA    | NA  | 457.88  | 0.78 | 0.52 | M | ERS18420510 |
| CGG1020782 | MDHI97-11 | NA   | Mackenzie Delta, Hendrickson Island | Contemporary | 01/08/1997 | NA   | NA  | NA     | NA    | NA  | 512.68  | 0.78 | 1.02 | F | ERS18420511 |
| CGG1020783 | MDHI97-12 | NA   | Mackenzie Delta, Hendrickson Island | Contemporary | 25/07/1997 | NA   | NA  | NA     | NA    | NA  | 1034.38 | 0.94 | 1.00 | F | ERS18420512 |
| CGG1020785 | MDHI97-16 | NA   | Mackenzie Delta, Hendrickson Island | Contemporary | 26/07/1997 | NA   | NA  | NA     | NA    | NA  | 569.27  | 0.87 | 0.55 | M | ERS18420513 |
| CGG1021656 | 1430      | NA   | Anadyr Gulf                         | Contemporary | NA/NA/2010 | NA   | NA  | NA     | NA    | NA  | 690.80  | 0.82 | 1.04 | F | ERS18420514 |
| CGG1021657 | 1435      | NA   | Anadyr Gulf                         | Contemporary | NA/NA/2010 | NA   | NA  | NA     | NA    | NA  | 499.83  | 0.74 | 0.53 | M | ERS18420515 |
| CGG1021658 | 1431      | NA   | Anadyr Gulf                         | Contemporary | NA/NA/2010 | NA   | NA  | NA     | NA    | NA  | 398.22  | 0.78 | 1.02 | F | ERS18420516 |
| CGG1021659 | 1432      | NA   | Anadyr Gulf                         | Contemporary | NA/NA/2010 | NA   | NA  | NA     | NA    | NA  | 1112.09 | 0.90 | 0.55 | M | ERS18420517 |
| CGG1021660 | 1437      | NA   | Anadyr Gulf                         | Contemporary | NA/NA/2010 | NA   | NA  | NA     | NA    | NA  | 949.48  | 0.98 | 1.02 | F | ERS18420518 |
| CGG1021661 | 2411      | NA   | Anadyr Gulf                         | Contemporary | NA/NA/2011 | NA   | NA  | NA     | NA    | NA  | 435.87  | 0.79 | 1.05 | F | ERS18420519 |
| CGG1021662 | 2427      | NA   | Anadyr Gulf                         | Contemporary | NA/NA/2011 | NA   | NA  | NA     | NA    | NA  | 715.12  | 0.69 | 1.06 | F | ERS18420520 |
| CGG1021663 | 2441      | NA   | Anadyr Gulf                         | Contemporary | NA/NA/2011 | NA   | NA  | NA     | NA    | NA  | 2378.93 | 0.49 | 0.53 | M | ERS18420521 |
| CGG1021664 | 2408      | NA   | Anadyr Gulf                         | Contemporary | NA/NA/2011 | NA   | NA  | NA     | NA    | NA  | 694.20  | 0.98 | 1.03 | F | ERS18420522 |
| CGG1021665 | 2418      | NA   | Anadyr Gulf                         | Contemporary | NA/NA/2011 | NA   | NA  | NA     | NA    | NA  | 633.49  | 0.70 | 0.54 | M | ERS18420523 |
| CGG1020235 | 34577     | NA   | Cook Inlet                          | Contemporary | 13/09/2000 | NA   | NA  | NA     | NA    | NA  | 379.91  | 0.79 | 0.55 | M | ERS18420524 |
| CGG1020233 | 10044     | NA   | Cook Inlet                          | Contemporary | 22/07/2002 | NA   | NA  | NA     | NA    | NA  | 694.54  | 2.87 | 1.02 | F | ERS18420525 |
| CGG1020232 | 10921     | NA   | Cook Inlet                          | Contemporary | 19/06/2000 | NA   | NA  | NA     | NA    | NA  | 648.84  | 1.96 | 1.05 | F | ERS18420526 |
| CGG1020231 | 10918     | NA   | Cook Inlet                          | Contemporary | 01/10/1998 | NA   | NA  | NA     | NA    | NA  | 940.04  | 2.31 | 0.54 | M | ERS18420527 |
| CGG1020229 | 16604     | NA   | Cook Inlet                          | Contemporary | NA/NA/NA   | NA   | NA  | NA     | NA    | NA  | 436.11  | 1.23 | 1.04 | F | ERS18420528 |
| CGG1020228 | 28925     | NA   | Cook Inlet                          | Contemporary | 15/06/1998 | NA   | NA  | NA     | NA    | NA  | 967.54  | 1.18 | 0.98 | F | ERS18420529 |
| CGG1020227 | 17296     | NA   | Cook Inlet                          | Contemporary | 04/08/2003 | NA   | NA  | NA     | NA    | NA  | 531.89  | 0.73 | 0.55 | M | ERS18420530 |
| CGG1020236 | 49105     | NA   | Bristol Bay                         | Contemporary | 02/09/2005 | NA   | NA  | NA     | NA    | NA  | 176.25  | 0.45 | 1.02 | F | ERS18420531 |
| CGG1020226 | 55825     | NA   | Bristol Bay                         | Contemporary | 20/05/2006 | NA   | NA  | NA     | NA    | NA  | 762.33  | 1.47 | 1.02 | F | ERS18420532 |
| CGG1020225 | 47964     | NA   | Bristol Bay                         | Contemporary | 20/05/2005 | NA   | NA  | NA     | NA    | NA  | 619.06  | 1.31 | 0.54 | M | ERS18420533 |
| CGG1020223 | 33593     | NA   | Bristol Bay                         | Contemporary | 09/05/2003 | NA   | NA  | NA     | NA    | NA  | 408.34  | 1.13 | 0.54 | M | ERS18420534 |

|            |       |    |             |              |            |    |    |    |    |    |        |      |      |   |             |
|------------|-------|----|-------------|--------------|------------|----|----|----|----|----|--------|------|------|---|-------------|
| CGG1020222 | 43382 | NA | Bristol Bay | Contemporary | 21/05/2004 | NA | NA | NA | NA | NA | 377.74 | 0.74 | 0.54 | M | ERS18420535 |
| CGG1020221 | 43392 | NA | Bristol Bay | Contemporary | 21/05/2004 | NA | NA | NA | NA | NA | 408.25 | 0.72 | 1.07 | F | ERS18420536 |
| CGG1020220 | 43391 | NA | Bristol Bay | Contemporary | 22/05/2004 | NA | NA | NA | NA | NA | 309.18 | 0.61 | 1.06 | F | ERS18420537 |
| CGG1020219 | 61079 | NA | Bristol Bay | Contemporary | NA/09/2006 | NA | NA | NA | NA | NA | 273.38 | 0.90 | 0.99 | F | ERS18420538 |
| CGG1020218 | 61076 | NA | Bristol Bay | Contemporary | NA/09/2006 | NA | NA | NA | NA | NA | 320.67 | 1.10 | 0.54 | M | ERS18420539 |
| CGG1020217 | 61075 | NA | Bristol Bay | Contemporary | NA/09/2006 | NA | NA | NA | NA | NA | 400.15 | 0.93 | 0.55 | M | ERS18420540 |

**Table S3 Stable isotope data summary.** Various combinations of sex and time period were analysed as groups. Sample size (n),  $\delta^{13}\text{C}$  and  $\delta^{15}\text{N}$  mean and SD (‰) in each group analyzed.

| Sex     | Time period  | n  | $\delta^{13}\text{C}$ (‰) | $\delta^{15}\text{N}$ (‰) |
|---------|--------------|----|---------------------------|---------------------------|
| F       | All          | 16 | -13.2 (0.63)              | 20.0 (0.71)               |
| M       | All          | 24 | -13.8 (0.66)              | 20.0 (0.45)               |
| F and M | 1290-1440 CE | 16 | -13.9 (0.58)              | 20.0 (0.40)               |
| F and M | 1450-1650 CE | 13 | -13.3 (0.71)              | 20.2 (0.68)               |
| F and M | 1800-1870 CE | 11 | -13.3 (0.67)              | 19.8 (0.59)               |
| F       | 1290-1440 CE | 6  | -13.4 (0.56)              | 20.0 (0.59)               |
| M       | 1290-1440 CE | 10 | -14.2 (0.37)              | 20.0 (0.27)               |
| F       | 1450-1650 CE | 7  | -13.3 (0.72)              | 20.1 (0.87)               |
| M       | 1450-1650 CE | 6  | -13.4 (0.77)              | 20.2 (0.43)               |
| F       | 1800-1870 CE | 3  | -12.7 (0.34)              | 19.6 (0.56)               |
| M       | 1800-1870 CE | 8  | -13.6 (0.62)              | 19.9 (0.62)               |

**Table S4 Simulation summary.** Metrics of the linear regression fit of simulated nucleotide diversity as a function of time for each simulation scenario shown in panels in Figure S4.

| <b>N_start</b> | <b>N_hunted</b> | <b>census_ratio</b> | <b>p value</b> | <b>r. quared</b> | <b>slope</b> |
|----------------|-----------------|---------------------|----------------|------------------|--------------|
| 40000          | 250             | 0.3                 | 0.42           | 3.00E-04         | -1.00E-09    |
| 40000          | 250             | 0.5                 | 0.92           | 5.00E-06         | -3.00E-10    |
| 40000          | 250             | 0.7                 | 0.25           | 7.00E-04         | -3.00E-09    |
| 40000          | 500             | 0.3                 | 0.66           | 1.00E-04         | -8.00E-10    |
| 40000          | 500             | 0.5                 | 0.91           | 7.00E-06         | -2.00E-10    |
| 40000          | 500             | 0.7                 | 0.32           | 5.00E-04         | -2.00E-09    |
| 40000          | 1000            | 0.3                 | 0.63           | 1.00E-04         | 1.00E-09     |
| 40000          | 1000            | 0.5                 | 1.00           | 8.00E-09         | -9.00E-12    |
| 40000          | 1000            | 0.7                 | 0.81           | 3.00E-05         | 6.00E-10     |

**Table S5 Mitogenome diversity statistics.** Values were estimated for the Mackenzie Delta belugas from each of four time periods, and for the three adjacent populations.

| <b>Population</b> | <b>Time period</b> | <b>Samples</b> | <b>segregating sites (S)</b> | <b>Haplotypes (h)</b> | <b>Haplotype diversity (H)</b> | <b>Nucleotide diversity (<math>\pi</math>)</b> |
|-------------------|--------------------|----------------|------------------------------|-----------------------|--------------------------------|------------------------------------------------|
| Mackenzie Delta   | 1290-1440 CE       | 16             | 71                           | 15                    | 0.99                           | 0.0011                                         |
| Mackenzie Delta   | 1450-1650 CE       | 12             | 52                           | 10                    | 0.97                           | 0.0009                                         |
| Mackenzie Delta   | 1800-1870 CE       | 12             | 56                           | 12                    | 1.00                           | 0.0007                                         |
| Mackenzie Delta   | Contemporary       | 10             | 49                           | 8                     | 0.96                           | 0.0011                                         |
| Anadyr            | Contemporary       | 10             | 40                           | 7                     | 0.91                           | 0.0011                                         |
| Bristol Bay       | Contemporary       | 10             | 4                            | 5                     | 0.80                           | 0.0001                                         |
| Cook Inlet        | Contemporary       | 7              | 51                           | 5                     | 0.91                           | 0.0015                                         |

**Table S6 Quality control.** Standard deviations for the carbon and nitrogen isotopic compositions of the calibration standards used in all the analytical sessions associated with the data presented in this study.

| <b>Standard</b> | <b>Material</b> | <b><i>n</i></b> | <b><math>\delta^{13}\text{C}</math> (<math>\pm 1\sigma</math>)</b> | <b><math>\delta^{15}\text{N}</math> (<math>\pm 1\sigma</math>)</b> |
|-----------------|-----------------|-----------------|--------------------------------------------------------------------|--------------------------------------------------------------------|
| USGS40          | Glutamic acid   | 18              | 0.04                                                               | 0.23                                                               |
| USGS41a         | Glutamic acid   | 7               | 0.04                                                               | 0.15                                                               |
| USGS63          | Caffeine        | 10              | 0.07                                                               | 0.12                                                               |
| USGS66          | Glycine         | 12              | 0.07                                                               | 0.3                                                                |



**Table S7 Isotopic reference materials used to monitor internal accuracy and precision.** The isotopic compositions used as the accepted values for these internal standards represent long-term averages.

| <b>Standard</b> | <b>Material</b>          | <b>Mean <math>\delta^{13}\text{C}</math> (‰, VPDB)</b> | <b>Mean <math>\delta^{15}\text{N}</math> (‰, AIR)</b> |
|-----------------|--------------------------|--------------------------------------------------------|-------------------------------------------------------|
| SRM-1           | Caribou bone collagen    | $-19.39 \pm 0.09$                                      | $+01.85 \pm 0.19$                                     |
| SRM-2           | Walrus bone collagen     | $-14.80 \pm 0.07$                                      | $+15.58 \pm 0.18$                                     |
| SRM-14          | Polar bear bone collagen | $-13.63 \pm 0.09$                                      | $+21.56 \pm 0.23$                                     |
| SRM-15          | Deer bone collagen       | $-26.89 \pm 0.08$                                      | $+06.91 \pm 0.18$                                     |
| SRM-16          | Seal bone collagen       | $-14.78 \pm 0.08$                                      | $+16.93 \pm 0.19$                                     |
| SRM-17          | Phenylalanine            | $-12.41 \pm 0.10$                                      | $+03.18 \pm 0.22$                                     |

**Table S8 Quality assurance.** Summary of the mean and standard deviation of carbon and nitrogen isotopic compositions for all check (quality assurance) standards analyzed alongside the samples presented in this study.

| Standard | <i>n</i> | $\delta^{13}\text{C}$ (‰, VPDB) | $\delta^{15}\text{N}$ (‰, AIR) |
|----------|----------|---------------------------------|--------------------------------|
|          |          | Mean $\pm$ 1 $\sigma$           | Mean $\pm$ 1 $\sigma$          |
| SRM-1    | 5        | -19.37 $\pm$ 0.02               | +1.96 $\pm$ 0.07               |
| SRM-2    | 10       | -14.80 $\pm$ 0.07               | +15.61 $\pm$ 0.16              |
| SRM-14   | 22       | -13.67 $\pm$ 0.05               | +21.55 $\pm$ 0.12              |
| SRM-15   | 13       | -26.89 $\pm$ 0.04               | +6.87 $\pm$ 0.20               |
| SRM-16   | 12       | -14.81 $\pm$ 0.08               | +16.77 $\pm$ 0.28              |
| SRM-17   | 8        | -12.43 $\pm$ 0.03               | +3.04 $\pm$ 0.18               |

## References

1. M. Petr, B. C. Haller, P. L. Ralph, F. Racimo, slendr: a framework for spatio-temporal population genomic simulations on geographic landscapes. *Peer Community Journal* **3** (2023).
